# Supplementary material for: Mineral substituted hydroxyapatite coatings deposited on nanoporous TiO2 modulate the directional growth and activity of osteoblastic cells
Source: Royal Society of Chemistry journal article supplement (doi:10.1039/c5ra11037h), 2015-01-01
Supplement: c5ra11037h1.pdf [file c5ra11037h1.pdf]

## Supporting Information

### Minerals Substituted Hydroxyapatite Deposited on TiO<sub>2</sub> Nanoporous Modulate the Directional Growth and Activity of Osteoblastic Cells<sup>†</sup>

*Dharman Govindaraj,<sup>a</sup> Mariappan Rajan,<sup>a\*</sup> Murugan A. Munusamy<sup>b</sup>, and Akon Higuchi<sup>b, c</sup>*

#### Results and Discussion

##### Ions released test

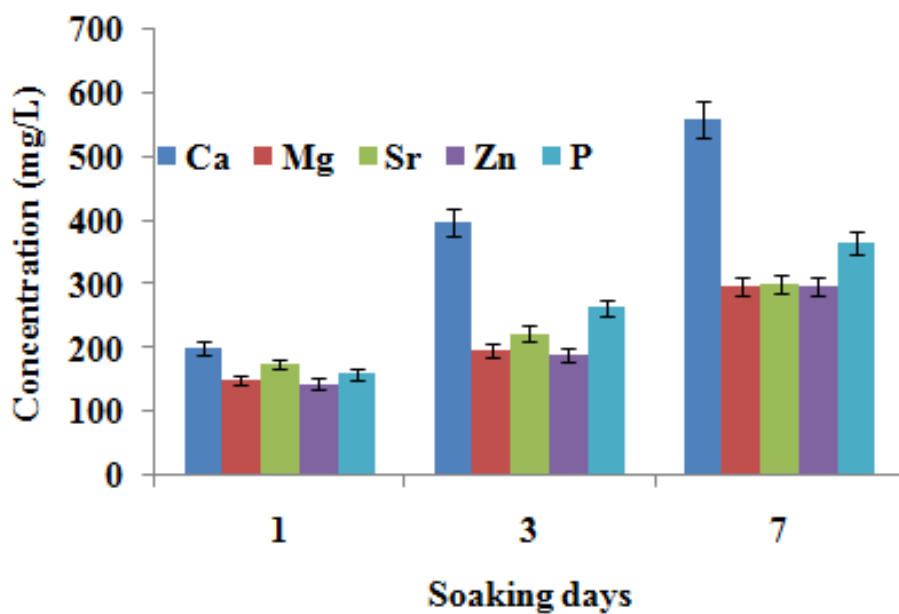

**Figure. S1** Ca, Mg, Sr, Zn and P concentrations in SBF solutions after soaking the M-HAP/TiO<sub>2</sub> (at 80°C) for various day periods.

## Adhesion strength

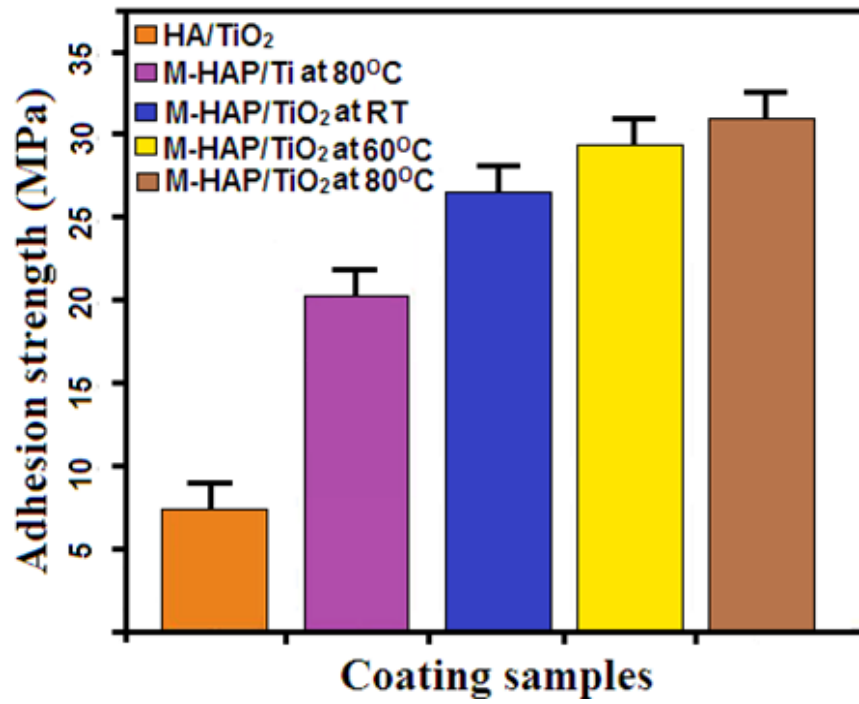

Figure. S2 Adhesion strength of coated samples.

## Antimicrobial activity

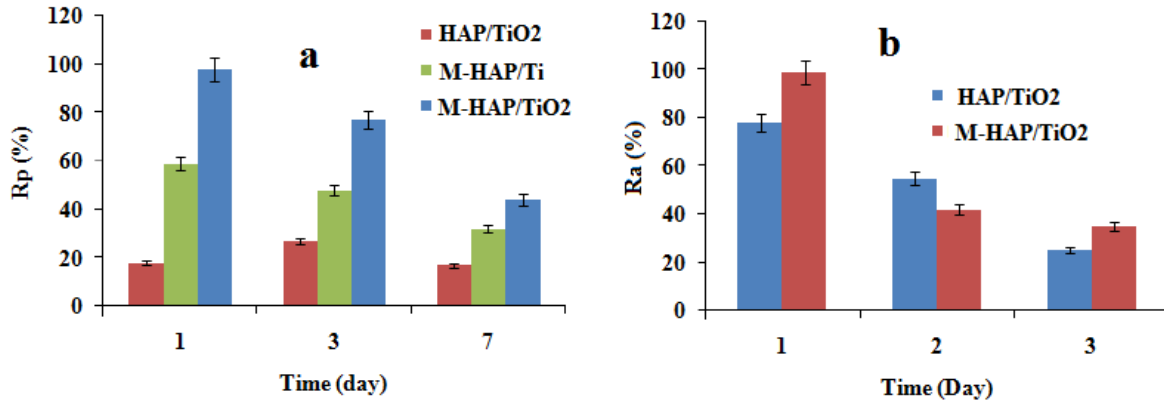

**Figure. S3** Antimicrobial activity of M-HAP coatings against (a) *E. coli* and (b) *S. aureus* (A= HAP deposition at 80 °C; B= M-HAP deposition at RT and C= M-HAP deposition at 80 °C)

## 1. Experimental Section

### 1.1. Preparation of nano M-HAP and HAP

From the start, 0.5 wt. % of serine and 0.294 M of  $\text{CaCl}_2 \cdot 4\text{H}_2\text{O}$  (Sigma Aldrich), 0.042 M  $\text{SrCl}_2 \cdot 6\text{H}_2\text{O}$  (Sigma Aldrich), 0.042 M  $\text{MgCl}_2 \cdot 6\text{H}_2\text{O}$  (Sigma Aldrich) and 0.042 M  $\text{ZnCl}_2 \cdot 6\text{H}_2\text{O}$  (Sigma Aldrich) were taken in glass beaker and stirred with vigorously a magnetic stirrer for 30 minutes to make sure the mutual interaction and the self-assembly process was completed. The solution was adjusted to pH 9.5 using  $\text{NH}_4\text{OH}$  (Sigma Aldrich). At that point 0.25 M  $(\text{NH}_4)_2\text{HPO}_4$  (Sigma Aldrich) was added dropwise to the mixture under stirred conditioned 6h and formed a white precipitate. The mixture was placed in a microwave oven and irradiated for 120 seconds at 740W (A CEM Discover microwave synthesizer (Model No: 908010) operating

at 180/264 V and 50/60 Hz with microwave power maximum level of 300 W and microwave frequency of 2455 MHz was employed for the microwave assisted experiments done in this work). Then, the resultant powder was thermally treated at 900°C for 2 h in a muffle furnace to obtain nano minerals substituted bioceramic. The pure HAP was also prepared by the same process yet without Sr, Mg and Zn sources.

## **2. Characterization**

### **2.1. HRTEM analysis**

The morphology and size of the as-prepared nanoparticles were characterized using high resolution transmission electron microscopy (HRTEM JEM-2010, JEOL). The nanoparticles for HRTEM analysis were dispersed in acetone by sonication and loaded on a carbon coated copper mesh.

### **2.2. Protein adsorption assay**

A 1 ml droplet of least crucial medium (a-MEM) (Hyclone) containing 10% fetal calf serum (FCS, Hyclone) was pipetted onto every example set in 24-well plates. After brooding at 37°C for 2 h, the examples were put in new 24-well plates and washed with PBS three times. An aliquot of 500µL of 1% sodium dodecyl sulfate (SDS) arrangement was added to these wells, which were shaken at 200 rpm for 1 h to segregate proteins from the surfaces of nano ceramic on titanium implants. A Micro BCA protein test pack (Boster) was utilized to gauge the protein fixations in the SDS arrangements.

## **3. Results and Discussion**

### **3.1. HRTEM analysis of the synthesized HAP and M-HAP nanoparticles**

The size and morphology of the synthesized HAP and M-HAP nanoparticles were further assessed by HRTEM and the picture is demonstrated in Figure. S4. As can be visually perceived from the micrograph it is clear that the HAP and M-HAP demonstrated the particles with the size

extended from 100 to 150 nm. EDAX examination obviously demonstrated the vicinity of Ca, P, O, Sr, Mg and Zn in the HAP [1]. Subsequently, EDAX examination affirmed that, no unclean components were discovered in the structure.

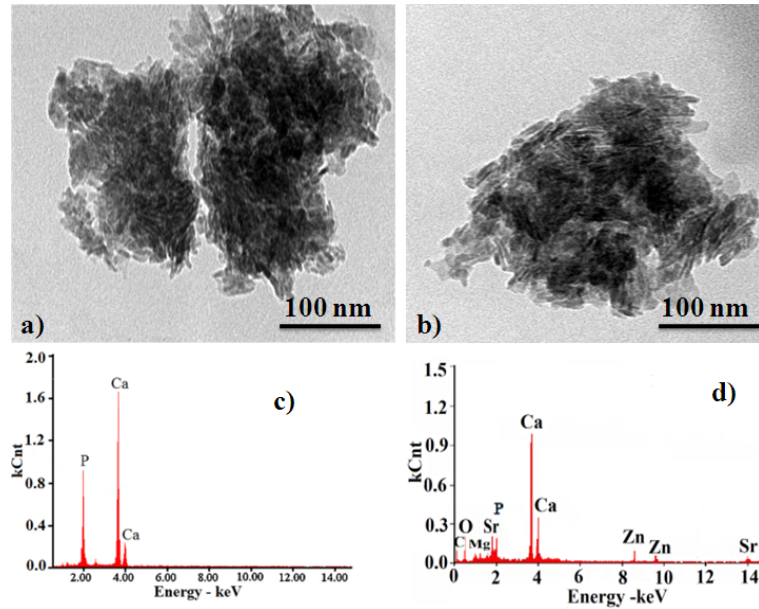

**Figure. S4** TEM images of (a) HAP and (b) M-HAP.

### **Protein adsorption**

The control of protein/surface collaborations by outside jolts is often needed in bio-applications [2]. Protein adsorption information from the culture medium with 10% FCS after 2 h of brooding is shown in Figure. S5. The measure of protein on the M-HAP/Ti, TiO<sub>2</sub> and HAP/TiO<sub>2</sub> specimen was short of what that on the M-HAP/TiO<sub>2</sub> covering at condition RT, 60 and 80°C specimens, resulting about enhanced osseointegration between bone and implant.

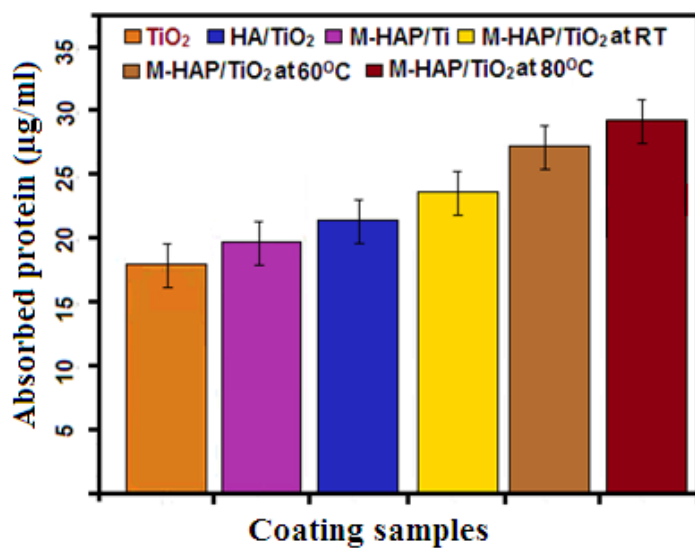

**Figure. S5** Measure of adsorbed protein on distinctive specimens after 2 h of incubation

## REFERENCES

- 1 S.C. Cox, P. Jamshidi, L.M. Grover, and K.K. Mallick, Mater Sci Eng C Mater Biol Appl. 2014, 35, 106.
- 2 W.Yang, Z. Tang, Y. Luan, W. Liu, D. Li and H.Chen, ACS Appl. Mater. Interfaces s 2013, 5, 3816–3823.
